# Supplementary material for: Liquid crystal-mediated self-assembly of copper nanoclusters with induced circular dichroism and amplified circularly polarized luminescence
Source: Royal Society of Chemistry journal article supplement (doi:10.1039/d4nr03125c), 2024-01-01
Supplement: d4nr03125c1.pdf [file d4nr03125c1.pdf]

## Electronic Supplementary Information

# Liquid Crystals-Mediated Self Assembly of Copper Nanoclusters with Induced Circular Dichroism and Amplified Circularly Polarized Luminescence

Shulin Li <sup>a</sup>, Ning Feng <sup>a</sup>, Mengdi Sun <sup>a</sup>, Yuxiang Sha <sup>a</sup>, Xia Xin <sup>a,\*</sup>, Hui Zhao <sup>b</sup>, Hongguang Li <sup>a,\*</sup>

<sup>a</sup> *National Engineering Research Center for Colloidal Materials, School of Chemistry and Chemical*

*Engineering, Shandong University, Jinan, 250100, China*

<sup>b</sup> *ShanDong Chambroad Holding Group Co., Ltd, Binzhou, 256600, China*

\*Author to whom correspondence should be addressed

E-mail: [xinx@sdu.edu.cn](mailto:xinx@sdu.edu.cn). Phone: +86-531-88363597. Fax: +86-531-88361008

E-mail: [hgli@sdu.edu.cn](mailto:hgli@sdu.edu.cn). Phone: +86-531-88363597. Fax: +86-531-88564750

---

## 1 Experimental Section

### 1.1 Materials

For the synthesis of G-SH-Cu NCs, we referenced the Andrey L. Rogach synthetic route<sup>1</sup>. Polyvinyl Pyrrolidone (PVP), and copper sulfate ( $\text{CuSO}_4$ ) were bought from Kermel Chemical Reagent Co. L-ascorbic acid (AA), and L-glutathione reduced (G-SH) were obtained from Sinopharm Chemical Reagent Co. TX-100 was purchased from Sigma. All of the reagents purchased have not been further purified. The ultra-pure water used in the experiment was all ion-exchanged by ultrapure water plants (Ulupure, China).

### 1.2 Preparation of Chiral Liquid Crystals

The mass of the G-SH-Cu NCs was fixed and the added volume was 2 mL, different qualities of achiral TX-100 were added to G-SH-Cu NCs solution with stirring. After the samples were placed for 24 hours at 20°C, the polarization appeared and the chiral liquid crystals were prepared. The concentration of G-SH-Cu NCs is 28  $\text{mg}\cdot\text{mL}^{-1}$ , according to the concentration we selected, the appropriate volume of G-SH-Cu NCs solution was selected and diluted with water, then add TX-100 with a weight percentage of 50%.

### 1.3 Instruments

Fluorescence data are tested by FLS920 luminescence spectrometer system (Edinburgh Instruments, United Kingdom, Xenon lamp, 450 W). Fourier transform infrared (FT-IR) spectra were measured on a Tensor II spectrophotometer (Bruker, Germany). POM observations were performed using an AXIOSKOP 40/40 FL (ZEISS, Germany) microscope. Rheological measurements were proceeded on a HAAKE RS6000 rheometer (Thermo Fisher Scientific, Germany) with a cone-plate

---

system (Material: Ti, oscillatory mode, diameter: 35 mm; cone angle: 1°). The frequency scan was confirmed to be performed in the linear viscoelastic region, as the stress scan have been performed at a fixed 1 Hz before frequency scan measurement. The temperature of characterization and measurements were  $25.0 \pm 0.5$  °C, unless otherwise specified. Circular dichroism (CD) information and Circularly polarized luminescence (CPL) data were recorded on a Chirascan V100 circular dichroism spectrometer (Applied Photophysics, British), and the values of  $g_{lum}$  were averaged from the instrumental measurements at 455 nm to 465 nm. The UV-vis spectra were recorded on a Hitachi UV-vis 4100 spectrophotometer. Thermal gravity analysis (TGA) measurement was performed on a TGA5500 (TA, USA) at a scanning speed of  $10$  °C  $min^{-1}$  in the temperature range of 30 to 700 °C under a nitrogen flow.  $^1H$  NMR spectra were measured on a Bruker AVANCE III HD 400 MHz spectrometer (USA) at room temperature with tetramethylsilane (TMS) as reference. Small angle X-Ray scattering (SAXS) measurements were performed on the SAXSess mc2 system (Anton Paar, Austria) with Ni-filtered Cu  $K\alpha$  radiation (1.54 Å) at 40 kV and 40 mA.

## 2 Additional Figures

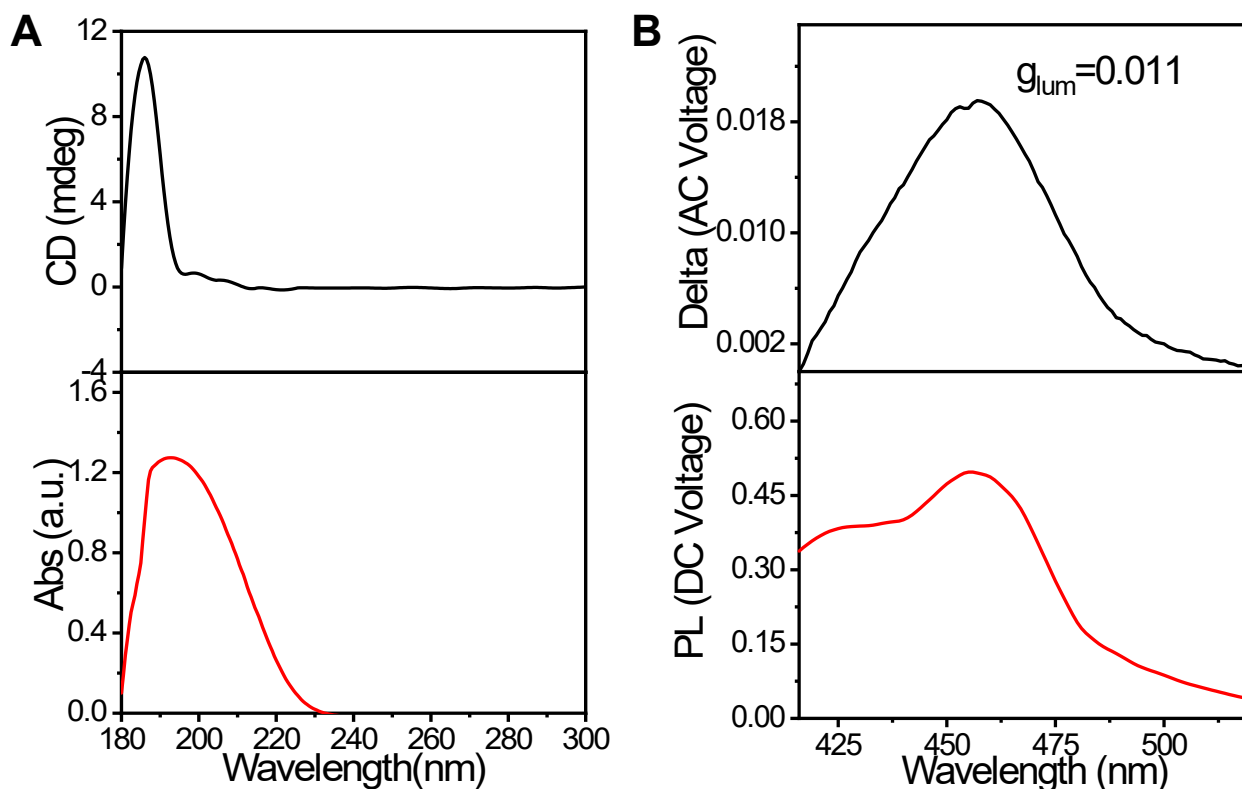

**Figure S1** Chiral properties of G-SH-Cu NCs: **A)** CD (top) spectra and absorbance (bottom) of G-SH-Cu NCs. **B)** CPL (top) and luminescence spectra (bottom) of G-SH-Cu NCs,  $\lambda_{ex} = 385$  nm.

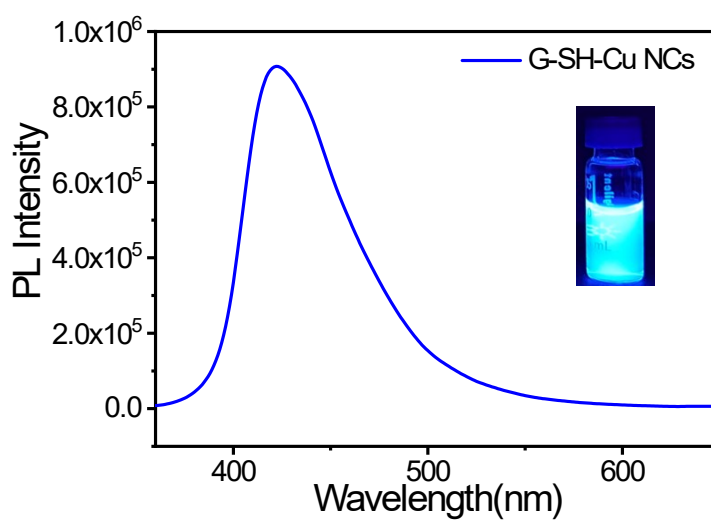

**Figure S2** PL (excitation wavelength 335 nm) spectra of G-SH-Cu NCs.

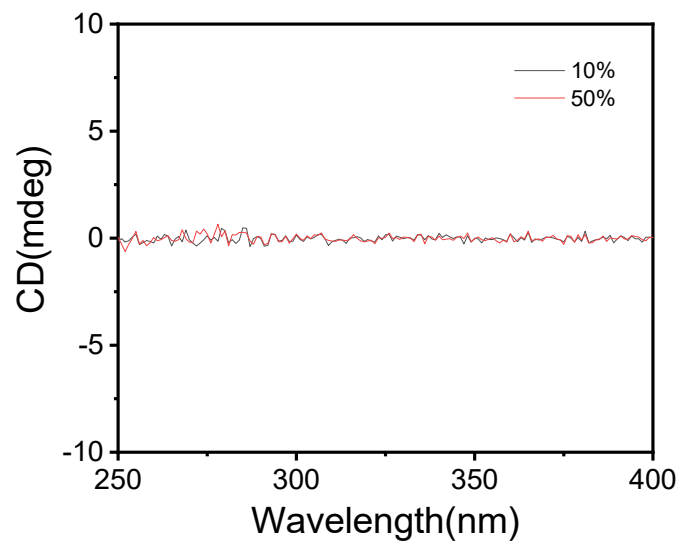

**Figure S3** The CD spectra of TX-100 in water.

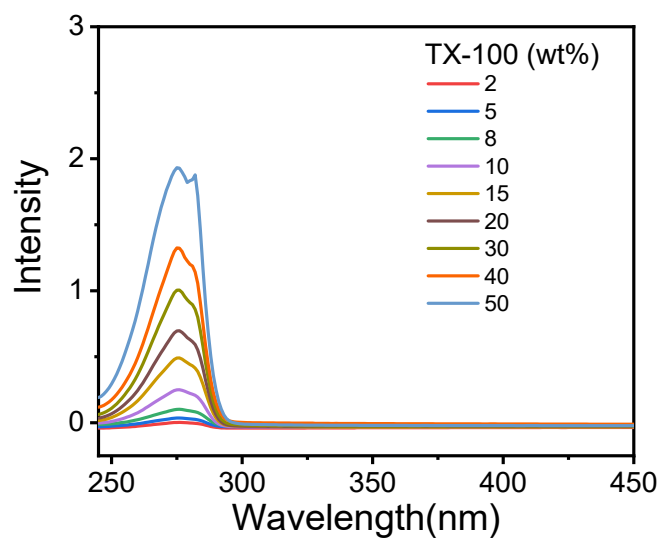

**Figure S4** UV-visible absorption spectra of different mass ratios of TX-100 (wt%) in water.

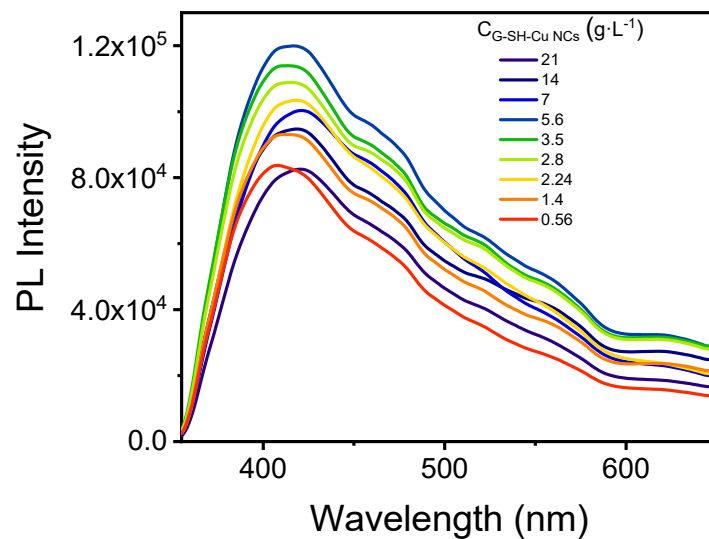

**Figure S5** Fluorescent spectra of G-SH-Cu NCs/TX-100 system ( $\lambda_{ex} = 335$  nm) at different concentrations of G-SH-Cu NCs (mg/mL).

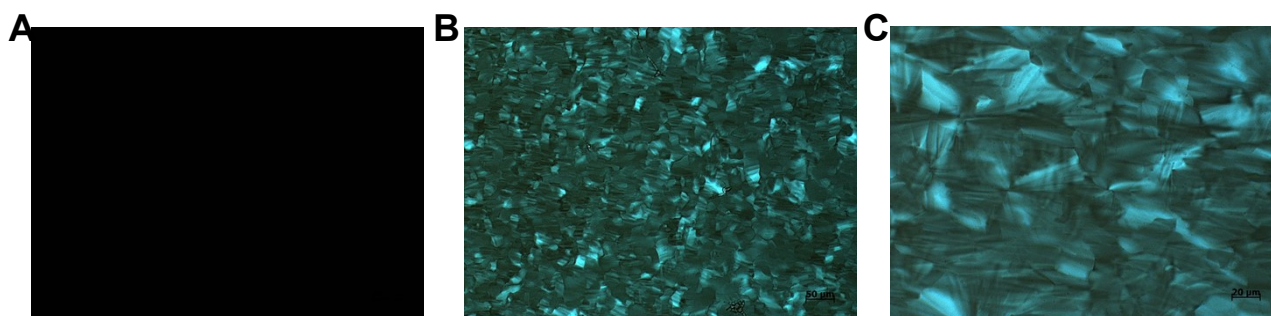

**Figure S6** POM images of A) 40wt% TX-100 and B) C) 50wt% TX-100 in water.

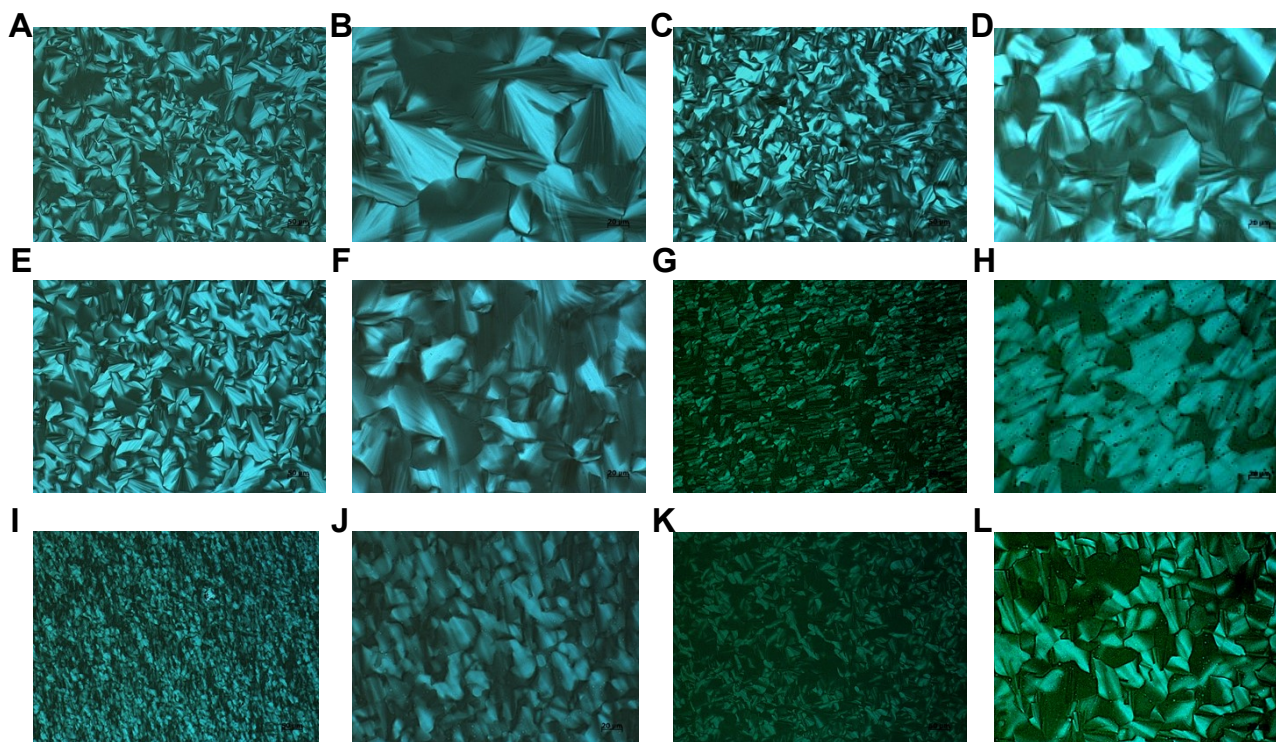

**Figure S7** POM photos of different concentrations of G-SH-Cu NCs combined with TX-100: **A) B)**  $0.56 \text{ g}\cdot\text{L}^{-1}$  G-SH-Cu NCs/50 wt% TX-100; **C) D)**  $1.4 \text{ g}\cdot\text{L}^{-1}$  G-SH-Cu NCs/50 wt% TX-100; **E) F)**  $2.8 \text{ g}\cdot\text{L}^{-1}$  G-SH-Cu NCs/50 wt% TX-100; **G) H)**  $7 \text{ g}\cdot\text{L}^{-1}$  G-SH-Cu NCs/50 wt% TX-100; **I) J)**  $14 \text{ g}\cdot\text{L}^{-1}$  G-SH-Cu NCs/50 wt% TX-100; **L) L)**  $21 \text{ g}\cdot\text{L}^{-1}$  G-SH-Cu NCs/ 50 wt% TX-100.

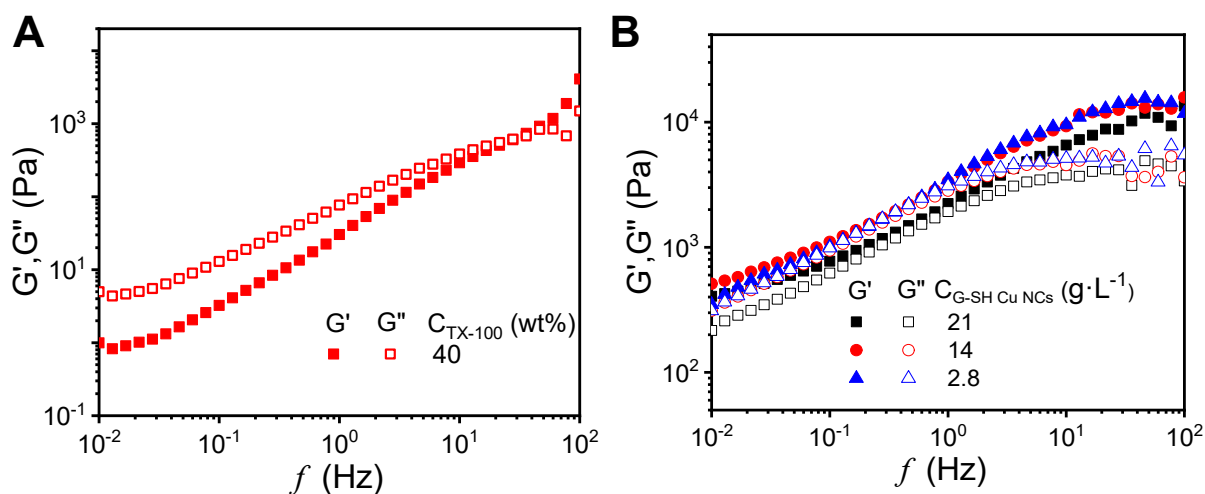

**Figure S8**  $G'$  and  $G''$  as a function of frequency: **A)**  $28 \text{ g}\cdot\text{L}^{-1}$  G-SH-Cu NCs/40 wt% TX-100 systems; **B)** G-SH-Cu NCs/50 wt% TX-100 systems at different  $c_{\text{G-SH-Cu NCs}}$  ( $\text{g}\cdot\text{L}^{-1}$ ).

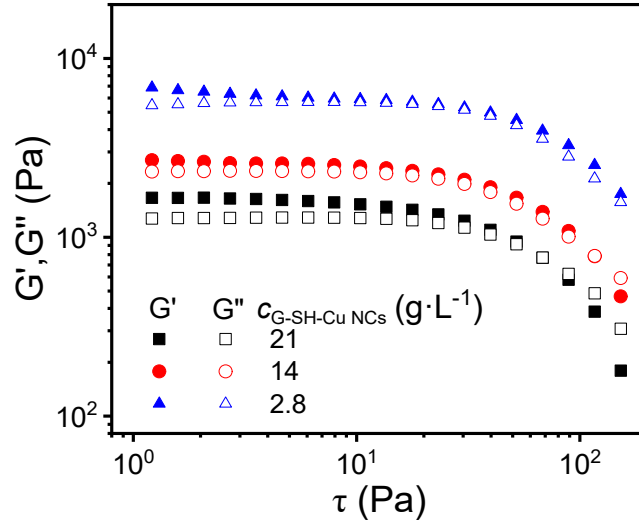

**Figure S9** The change of elastic modulus ( $G'$ ) and viscous modulus ( $G''$ ) with the stress ( $F = 1$  Hz,  $T = 25^\circ\text{C}$ ) of G-SH-Cu NCs/50 wt% TX-100 systems at different  $c_{\text{G-SH-Cu NCs}}$  ( $\text{g}\cdot\text{L}^{-1}$ ).

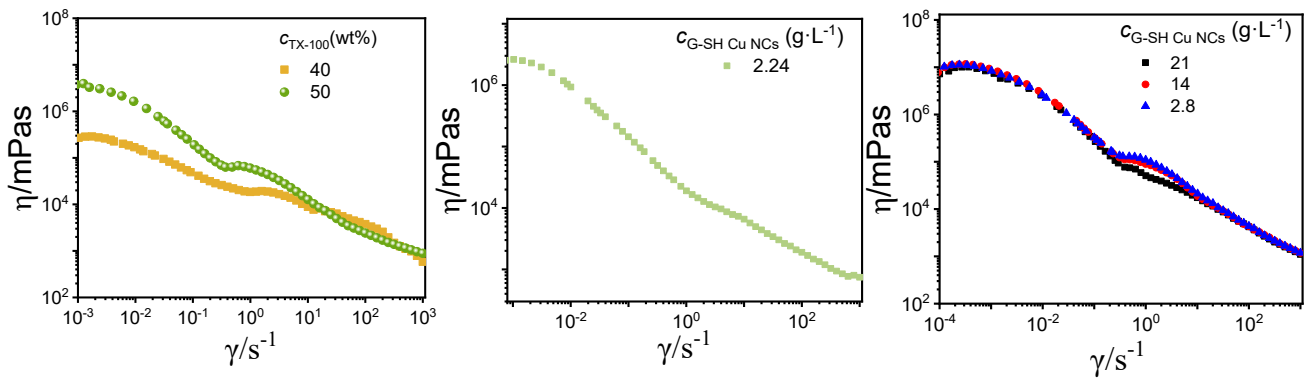

**Figure S10** The change of shear viscosity with shear rate of G-SH-Cu NCs/TX-100 system.



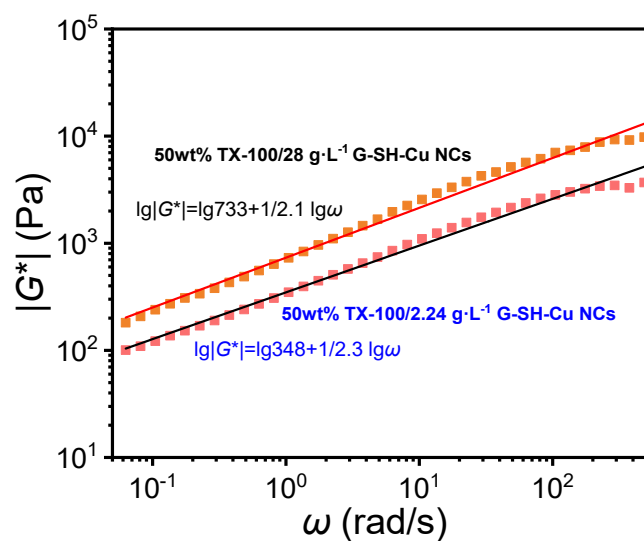

**Figure S11** Complex modulus  $|G^*|$  as a function of angular frequency ( $\omega$ ) of G-SH-Cu NCs/TX-100 system at different concentrations of G-SH-Cu NCs ( $\text{g}\cdot\text{L}^{-1}$ ).

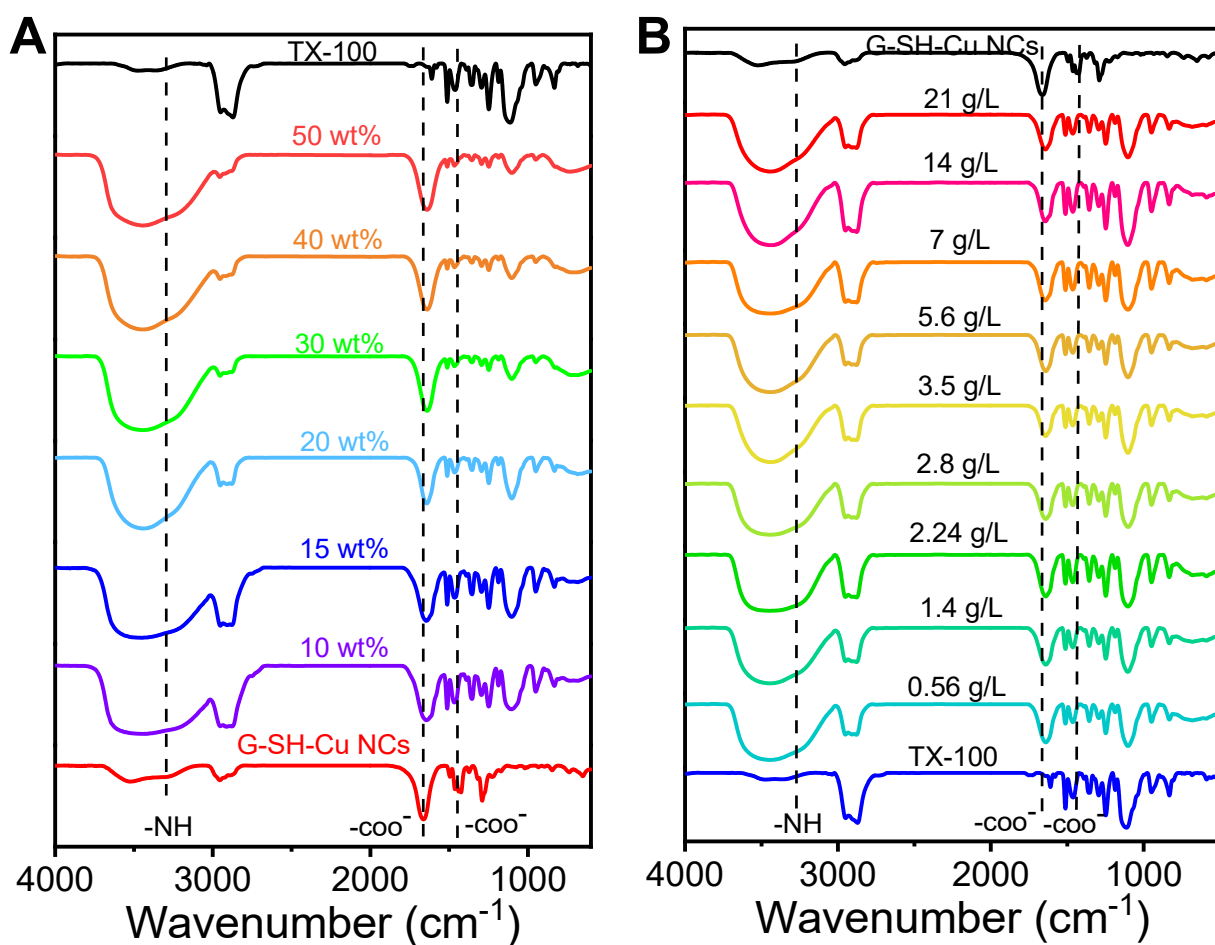

**Figure S12** Fourier transform infrared spectra of G-SH-Cu NCs/TX-100 system.

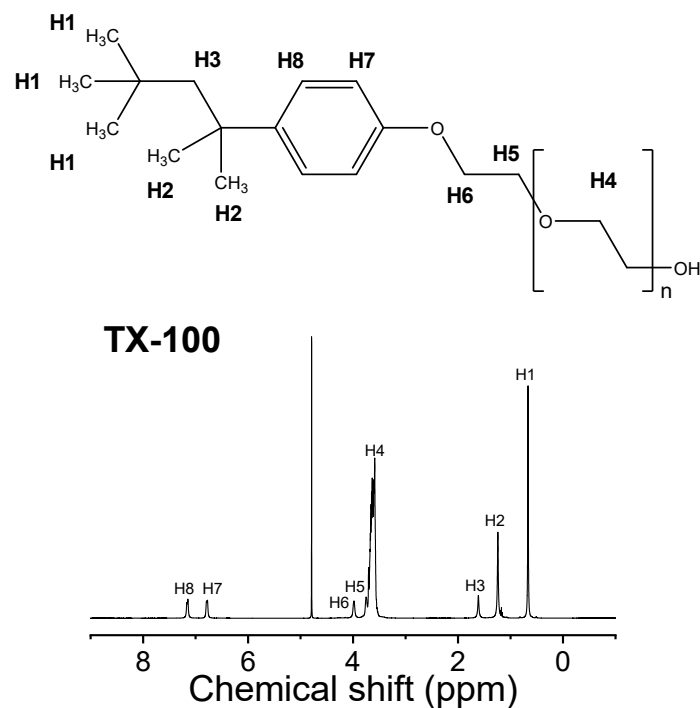

**Figure S13** Chemical structure and  $^1\text{H}$  NMR image of TX-100.

**Table S1.** The lattice parameters (D) for G-SH-Cu NCs/TX-100 hexagonal LCs at different concentrations of G-SH-Cu NCs ( $\text{g}\cdot\text{L}^{-1}$ )

| samples                    | TX-100 | 28 $\text{g}\cdot\text{L}^{-1}$ G-SH-Cu NCs/50wt% TX-100 | 2.24 $\text{g}\cdot\text{L}^{-1}$ G-SH-Cu NCs/50wt% TX-100 |
|----------------------------|--------|----------------------------------------------------------|------------------------------------------------------------|
| $q_1$ ( $\text{nm}^{-1}$ ) | 1.20   | 1.24                                                     | 1.21                                                       |
| D (nm)                     | 6.04   | 5.85                                                     | 5.99                                                       |

**Calculation of the interaction strength parameter (A) between molecules in lyotropic liquid crystal (LLCs) based on the Bohlin cooperative flow theory**

The quantitatively relationship between the microstructure of a flowing substance and its rheological properties could be determined by Bohlin cooperative flow theory which provides the link between the dynamic moduli and angular frequency ( $\omega$ ) concerning the interaction of molecules in LLCs by the following formula

---

$$|G^*| = \sqrt{G'^2 + G''^2} = A\omega^{\frac{1}{z}}$$

where  $|G^*|$  is the complex modulus,  $A$  is defined as the interaction strength between molecules in LLCs, and  $z$  is a parameter considered as the “coordination number” of the interactive flow units.

### References

- [1] Z. Wang, A. S. Susa, B. Chen, C. Reckmeier, O. Tomanec, R. Zboril, H. Zhong, A. L. Rogach, *Nanoscale* **2016**, 8, 7197-7202.
